# Supplementary material for: The Effect of Microbial Inoculum and Urea Supplements on Nutritive Value, Amino Acids Profile, Aerobic Stability and Digestibility of Wheat and Corn Silages
Source: Preprints.org preprint supplement (doi:10.20944/preprints202305.1771.v1), 2023-05-25
Supplement: Supplementary file 3 [file supplementary]

**Supplementary Materials:**


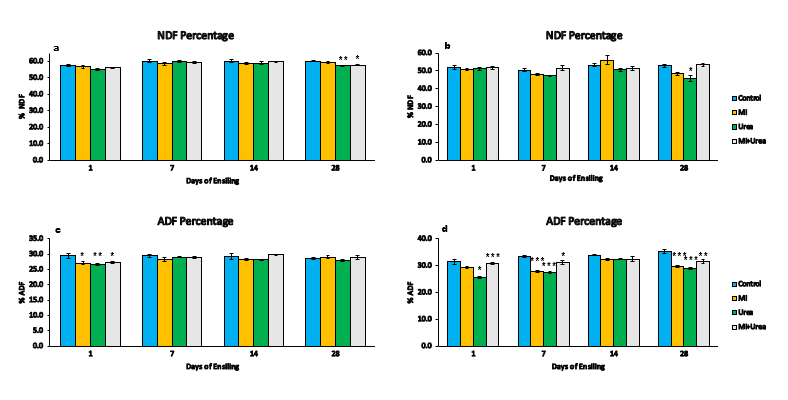


**Figure S1**. **a**. The NDF content of wheat silage with additives treatment at various days of ensiling; **b**. The NDF content of corn silage with additives treatment at various days of ensiling; **c**. The ADF content of wheat silage with additives treatment at various days of ensiling; **d**. The ADF content of corn silage with additives treatment at various days of ensiling. *0.05, **0.01 and ***0.001 Statistical significance at P < 0.05 after LSMeans Dunnett test.

**Table S 1**. The effect of additives and ensiling days on Hemicellulose content of wheat and corn silage

| Wheat silage | | | | |  |  | | |
| --- | --- | --- | --- | --- | --- | --- | --- | --- |
| Days | Treatment | | | |  | Main Effect (*P­*-Value) | | |
|  | Control | MI | Urea | MI+Urea | SEM | Trt | Day | Trt*Day |
| 1 | 29.4 | 29.5 | 28.5 | 28.9 | 0.258 | 0.0691 | 0.0029 | 0.4047 |
| 7 | 29.5 | 30.2 | 31.0 | 30.4 | 0.233 |  |  |  |
| 14 | 29.1 | 30.7 | 30.6 | 29.9 | 0.354 |  |  |  |
| 28 | 28.6 | 30.0* | 29.4 | 28.9 | 0.205 |  |  |  |
| Corn silage | | | | |  |  |  |  |
| Days | Treatment | | | |  | Main Effect (*P­*-Value) | | |
|  | Control | MI | Urea | MI+Urea | SEM | Trt | Day | Trt*Day |
| 1 | 20.5 | 21.6 | 25.4** | 20.9 | 0.604 | 0.0063 | <.0001 | 0.0001 |
| 7 | 16.9 | 20.2** | 20.0** | 20.1** | 0.436 |  |  |  |
| 14 | 19.3 | 23.8 | 18.2 | 19.1 | 0.816 |  |  |  |
| 28 | 17.6 | 18.6 | 16.8 | 21.9 | 0.726 |  |  |  |
| *0.05 and **0.01: Statistical significance at *p<* 0.05 after LSMeans Dunnett test, SEM: Standard error of the mean. | | | | | | | | |

**Table S 2**: The effect of additives and ensiling days on DM content of wheat and corn silage

| Wheat silage | | | | |  |  | | |
| --- | --- | --- | --- | --- | --- | --- | --- | --- |
| Days | Treatment | | | |  | Main Effect (*P­*-Value) | | |
|  | Control | MI | Urea | MI+Urea | SEM | Trt | Day | Trt*Day |
| 1 | 43.8 | 45.0* | 45.4* | 43.2 | 0.346 | <.0001 | <.0001 | 0.0048 |
| 7 | 43.7 | 43.4 | 44.4 | 43.7 | 0.163 |  |  |  |
| 14 | 43.9 | 43.0 | 44.6 | 43.4 | 0.279 |  |  |  |
| 28 | 41.9 | 42.2 | 44.1** | 42.7 | 0.332 |  |  |  |
| Corn silage | | | | |  |  |  |  |
| Days | Treatment | | | |  | Main Effect (*P­*-Value) | | |
|  | Control | MI | Urea | MI+Urea | SEM | Trt | Day | Trt*Day |
| 1 | 30.7 | 33.0 | 32.5 | 32.0 | 0.436 | <.0001 | <.0001 | 0.0290 |
| 7 | 29.6 | 31.9 | 31.6 | 30.6 | 0.463 |  |  |  |
| 14 | 28.7 | 29.3 | 31.7** | 30.8 | 0.500 |  |  |  |
| 28 | 28.7 | 29.5 | 30.6* | 31.0* | 0.432 |  |  |  |
| *0.05, and **0.01: Statistical significance at *p <* 0.05 after LSMeans Dunnett test, SEM: Standard error of the mean. | | | | | | | | |
